# Supplementary material for: Coffee Consumption and Incidence of Cardiovascular and Microvascular Diseases in Never-Smoking Adults with Type 2 Diabetes Mellitus
Source: MDPI journal article supplement (doi:10.3390/nu15183910), 2023-09-08
Supplement: s1 [file s1]

Supplementary Table S1. Definitions of CVD and MVD and the associated data source.

|                                           |                                                                          |
|-------------------------------------------|--------------------------------------------------------------------------|
| Cardiovascular and microvascular outcomes | ICD-10                                                                   |
| CHD                                       | I20–I25                                                                  |
| MI                                        | I21-I22                                                                  |
| stroke                                    | I60, I61, I62.9, I63, I64, I67.8, I69.0, and I69.3                       |
| HF                                        | I50                                                                      |
| Retinopathy                               | E10.3, E11.3, E12.3, E13.3, E14.3, H28.0, H33, H35.3, H36.0, and H40-H42 |
| Neuropathy                                | E10.4, E11.4, E13.4, E14.4, G59.0, G62.9, G63.2, and G99.0               |
| CKD                                       | E10.2, E11.2, E13.2, E14.2, N18-N19, N28.0, and I70.1                    |

CHD, coronary heart disease; CKD, chronic kidney disease; CVD, cardiovascular disease; HF, heart failure; MI, myocardial infarction. MVD, microvascular disease; ICD, International Classification of Disease.

**Supplementary Table S2. Hazard ratios of cardio-and microvascular diseases for coffee consumers (vs. non-consumers) with different preference of coffee types.**

|                    | None        | Decaffeinated coffee |                   |                   | Instant coffee    |                   |                   | Ground coffee     |                   |                   |
|--------------------|-------------|----------------------|-------------------|-------------------|-------------------|-------------------|-------------------|-------------------|-------------------|-------------------|
|                    | 1.00 (Ref.) | 0.5-1                | 2-4               | ≥5                | 0.5-1             | 2-4               | ≥5                | 0.5-1             | 2-4               | ≥5                |
| <b>Total CVD</b>   |             |                      |                   |                   |                   |                   |                   |                   |                   |                   |
| Events/N           | 548/2,859   | 114/578              | 139/760           | 35/188            | 295/1,520         | 331/1,930         | 117/571           | 80/507            | 104/626           | 24/99             |
| Model 3            | 1.00 (Ref.) | 1.00 (0.81, 1.24)    | 0.93 (0.76, 1.12) | 0.79 (0.54, 1.14) | 0.87 (0.75, 1.01) | 0.80 (0.69, 0.92) | 0.89 (0.72, 1.10) | 0.82 (0.64, 1.05) | 0.77 (0.62, 0.96) | 0.88 (0.56, 1.38) |
| <b>CHD</b>         |             |                      |                   |                   |                   |                   |                   |                   |                   |                   |
| Events/N           | 412/2,859   | 92/578               | 102/760           | 28/188            | 229/1,520         | 255/1,930         | 85/571            | 61/507            | 78/626            | 15/99             |
| Model 3            | 1.00 (Ref.) | 1.08 (0.85, 1.37)    | 0.89 (0.71, 1.11) | 0.80 (0.52, 1.22) | 0.90 (0.76, 1.07) | 0.82 (0.70, 0.97) | 0.87 (0.68, 1.12) | 0.80 (0.60, 1.06) | 0.77 (0.60, 0.98) | 0.70 (0.39, 1.25) |
| <b>MI</b>          |             |                      |                   |                   |                   |                   |                   |                   |                   |                   |
| Events/N           | 174/2859    | 29/578               | 27/760            | 13/188            | 89/1,520          | 99/1,930          | 39/571            | 24/507            | 29/626            | 7/99              |
| Model 3            | 1.00 (Ref.) | 0.92 (0.62, 1.36)    | 0.63 (0.42, 0.95) | 0.88 (0.47, 1.68) | 0.87 (0.66, 1.14) | 0.82 (0.63, 1.06) | 1.04 (0.72, 1.50) | 0.77 (0.49, 1.22) | 0.72 (0.47, 1.09) | 1.06 (0.49, 2.27) |
| <b>Stroke</b>      |             |                      |                   |                   |                   |                   |                   |                   |                   |                   |
| Events/N           | 100/2,859   | 14/578               | 25/760            | 6/188             | 58/1,520          | 53/1,930          | 23/571            | 13/507            | 19/626            | 7/99              |
| Model 3            | 1.00 (Ref.) | 0.70 (0.40, 1.23)    | 0.89 (0.56, 1.41) | 0.93 (0.40, 2.12) | 0.88 (0.62, 1.24) | 0.70 (0.49, 0.99) | 0.87 (0.52, 1.45) | 0.75 (0.41, 1.37) | 0.82 (0.50, 1.37) | 1.69 (0.74, 3.90) |
| <b>HF</b>          |             |                      |                   |                   |                   |                   |                   |                   |                   |                   |
| Events/N           | 177/2,859   | 30/578               | 32/760            | 11/188            | 78/1,520          | 101/1,930         | 29/571            | 26/507            | 26/626            | 11/99             |
| Model 3            | 1.00 (Ref.) | 0.81 (0.55, 1.21)    | 0.66 (0.45, 0.97) | 0.87 (0.47, 1.60) | 0.74 (0.56, 0.98) | 0.72 (0.56, 0.93) | 0.65 (0.43, 0.98) | 0.92 (0.61, 1.39) | 0.58 (0.38, 0.89) | 1.21 (0.61, 2.37) |
| <b>Total MVD</b>   |             |                      |                   |                   |                   |                   |                   |                   |                   |                   |
| Events/N           | 426/2,191   | 85/443               | 89/603            | 28/155            | 213/1,191         | 275/1,511         | 77/448            | 63/403            | 84/502            | 14/81             |
| Model 3            | 1.00 (Ref.) | 0.99 (0.78, 1.23)    | 0.71 (0.56, 0.90) | 0.82 (0.55, 1.23) | 0.87 (0.73, 1.03) | 0.85 (0.72, 0.99) | 0.79 (0.61, 1.02) | 0.80 (0.60, 1.06) | 0.84 (0.66, 1.07) | 0.87 (0.50, 1.51) |
| <b>Retinopathy</b> |             |                      |                   |                   |                   |                   |                   |                   |                   |                   |
| Events/N           | 230/2,191   | 50/443               | 47/603            | 19/155            | 122/1,191         | 159/1,511         | 50/448            | 34/403            | 53/502            | 8/81              |
| Model 3            | 1.00 (Ref.) | 1.10 (0.80, 1.51)    | 0.74 (0.53, 1.02) | 1.15 (0.71, 1.87) | 0.96 (0.77, 1.21) | 0.93 (0.75, 1.15) | 1.02 (0.75, 1.40) | 0.75 (0.50, 1.11) | 1.02 (0.75, 1.40) | 0.92 (0.43, 1.95) |
| <b>Neuropathy</b>  |             |                      |                   |                   |                   |                   |                   |                   |                   |                   |
| Events/N           | 64/2,191    | 9/443                | 14/603            | 5/155             | 23/1,191          | 42/1,511          | 6/448             | 12/403            | 10/502            | 3/81              |
| Model 3            | 1.00 (Ref.) | 0.83 (0.41, 1.69)    | 0.81 (0.43, 1.52) | 1.11 (0.44, 2.78) | 0.67 (0.41, 1.11) | 0.91 (0.59, 1.38) | 0.44 (0.19, 1.02) | 1.06 (0.53, 2.09) | 0.74 (0.38, 1.47) | 1.36 (0.42, 4.39) |
| <b>CKD</b>         |             |                      |                   |                   |                   |                   |                   |                   |                   |                   |
| Events/N           | 192/2,191   | 41/443               | 46/603            | 7/155             | 103/1,191         | 124/1,511         | 34/448            | 30/403            | 29/502            | 5/81              |
| Model 3            | 1.00 (Ref.) | 1.02 (0.72, 1.45)    | 0.77 (0.55, 1.08) | 0.34 (0.14, 0.82) | 0.88 (0.68, 1.13) | 0.82 (0.65, 1.05) | 0.74 (0.50, 1.08) | 0.92 (0.62, 1.37) | 0.61 (0.41, 0.92) | 0.72 (0.29, 1.75) |

CHD, coronary heart disease; CKD, chronic kidney disease; CVD, cardiovascular disease; HF, heart failure; MI, myocardial infarction. MVD, microvascular disease.

Model 3 was further adjusted for age (continuous, years), sex, ethnicity (White, Asian or Asian British, Black or Black British, and mixed), Townsend deprivation index (in quintile), BMI (continuous, kg/m<sup>2</sup>), physical activity (continuous, MET-h/week), alcohol consumption (never, former, current: <1, 1-2, and ≥3 drinks/week), diet score (continuous, points), hypertension (yes, no), hyperlipidemia (yes, no), HbA1c levels (continuous, mmol/mol), and diabetes duration (continuous, years).

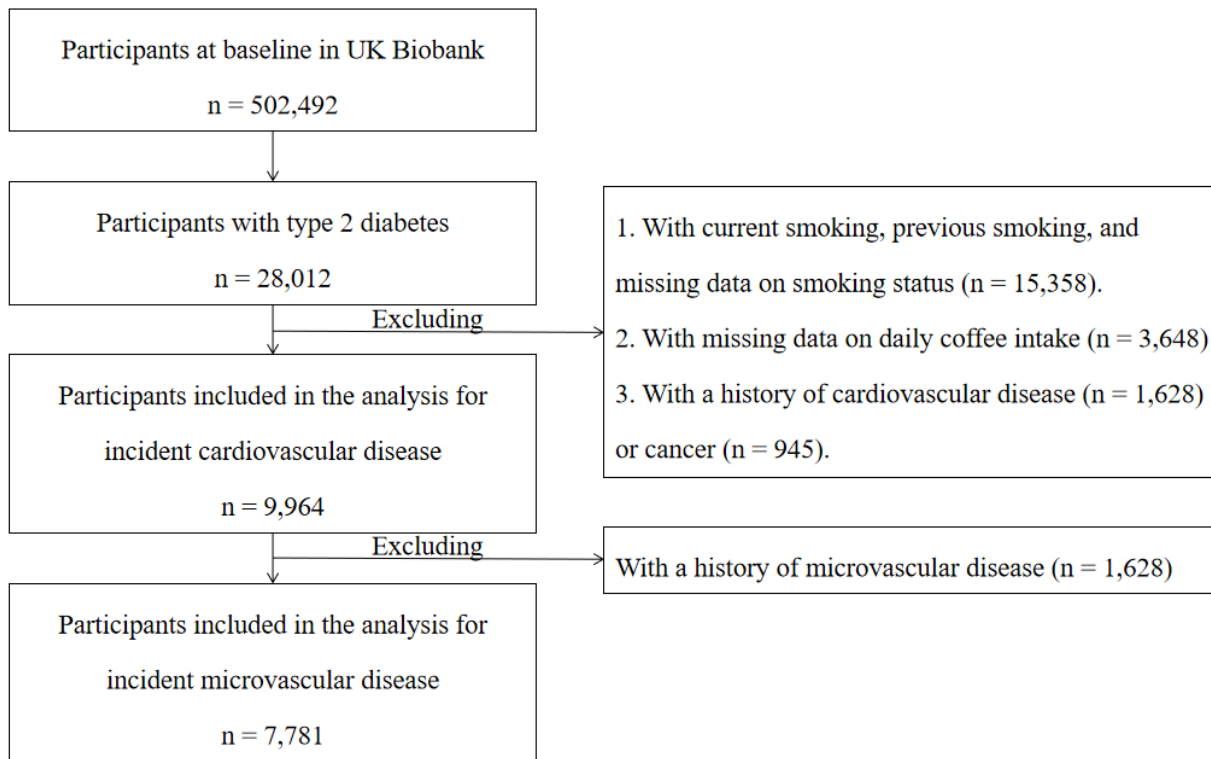

**Supplementary Figure S1. Flowchart of the selection of the study population from the UK Biobank study.**

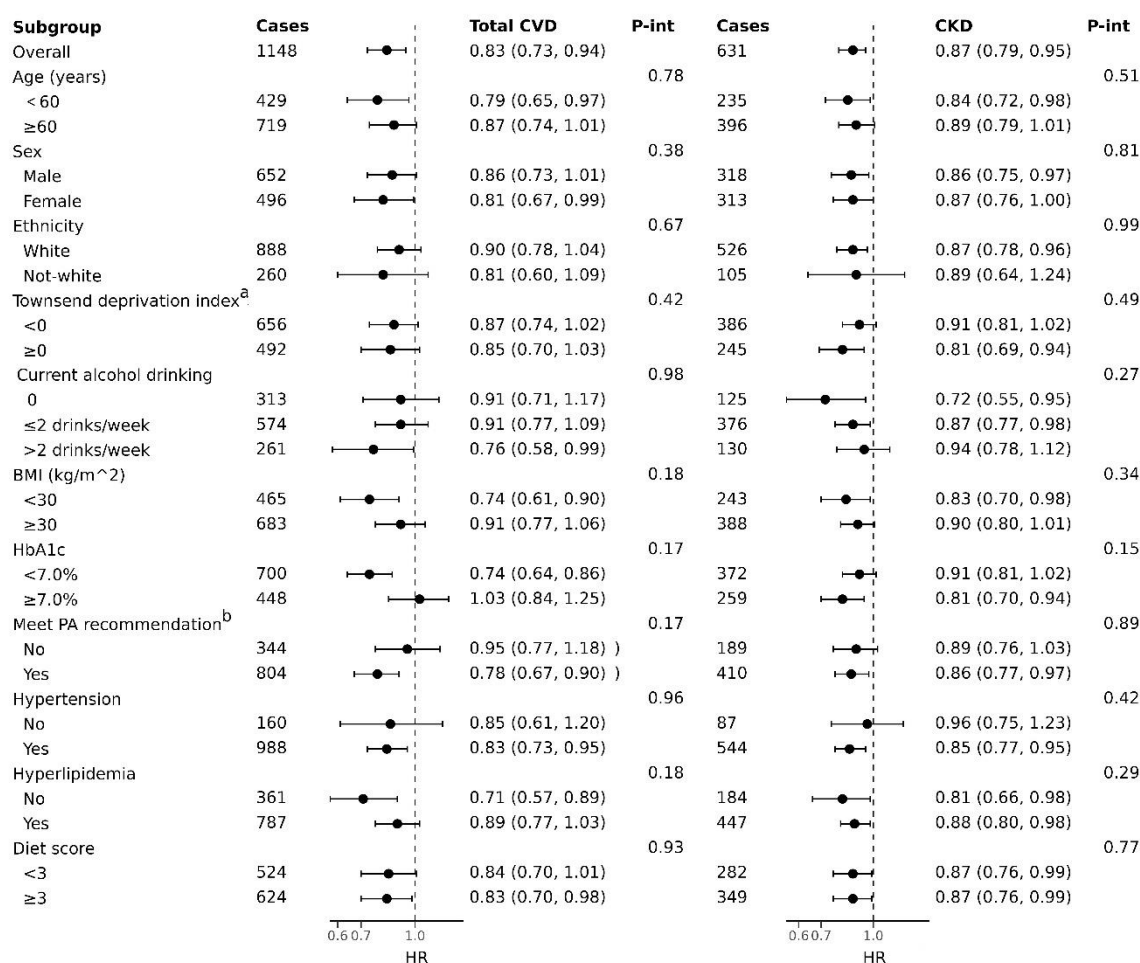

**Supplementary Figure S2. Subgroup analyses for the associations of coffee consumption with risk of total cardiovascular disease (2-4 vs. no cups/day) and CKD (per 2 cups per day).**

BMI, body mass index; PA, physical activity; P-int, P value for interaction.

<sup>a</sup> A higher Townsend deprivation index indicates a greater degree of deprivation (or lower socioeconomic status).  
<sup>b</sup> At or >150 min/week of moderate activity or 75 min/week of vigorous activity or an equivalent combination.  
 Results were adjusted for age (continuous, years), sex, ethnicity (White, Asian or Asian British, Black or Black British, and mixed), Townsend deprivation index (in quintile), BMI (continuous, kg/m<sup>2</sup>), physical activity (continuous, MET-h/week), alcohol consumption (never, former, current: <1, 1-2, and ≥3 drinks/week), diet score (continuous, points), hypertension (yes, no), hyperlipidemia (yes, no), HbA1c levels (continuous, mmol/mol), and diabetes duration (continuous, years).

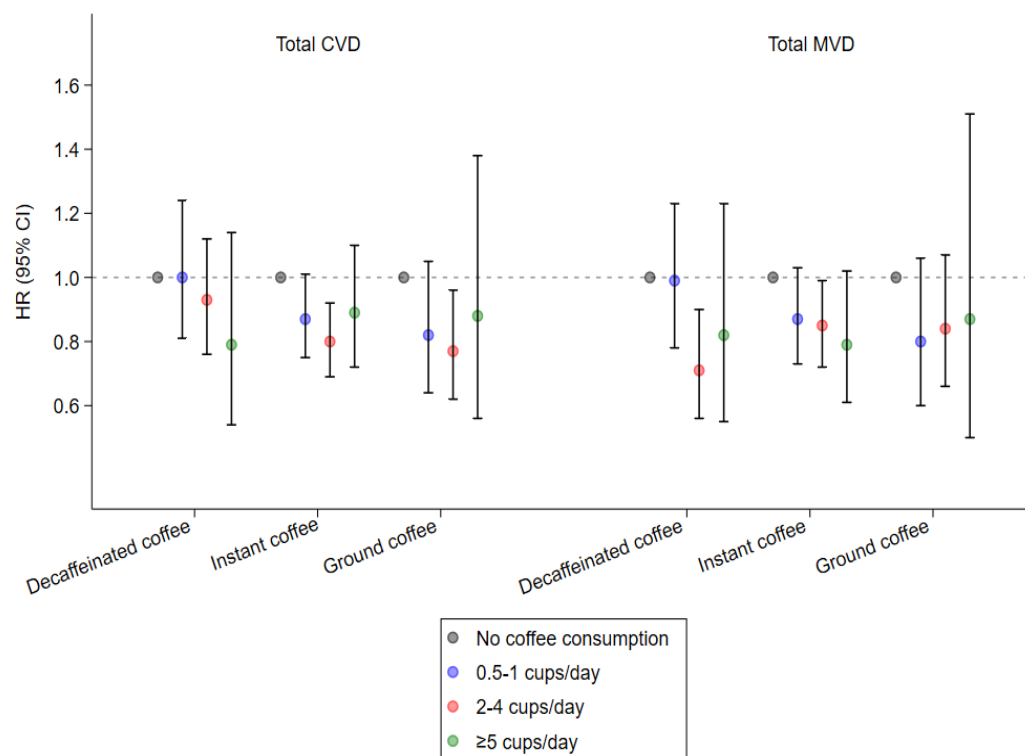

**Supplementary Figure S3. Hazard ratios of total cardio- and microvascular disease associated with different levels of coffee intake (vs. no coffee consumption) for participants usually consuming decaffeinated, instant, or ground coffee.**

CVD, cardiovascular disease; MVD, microvascular disease.

Results were adjusted for age (continuous, years), sex, ethnicity (White, Asian or Asian British, Black or Black British, and mixed), Townsend deprivation index (in quintile), BMI (continuous, kg/m<sup>2</sup>), physical activity (continuous, MET-h/week), alcohol consumption (never, former, current: <1, 1-2, and ≥3 drinks/week), diet score (continuous, points), hypertension (yes, no), hyperlipidemia (yes, no), HbA1c levels (continuous, mmol/mol), and diabetes duration (continuous, years).
